# Supplementary material
Source: publisher site journal article supplement (https://www.dovepress.com/article/330468)
Supplement: Supplementary file 1 [file get_supplementary_file.php]

**Supplementary 1: Audit Tool**

This question set was uploaded to the *RedCap* data capturing system.

| **Question** | | **Answer** |
| --- | --- | --- |
| 1 | Is their domestic accreditation, for their stated purpose as a Registered or Licensed facility, outlined? | Yes/No |
| 2 | Involvement with/as for-profit entities stated? | Yes/No |
| 3 | Does the organization process the ocular donation? | Yes/No |
| 3b | Do they describe how the process is done? | Yes/No |
| 4 | Does the organization transfer the donation to another processing group? | Yes/No |
| 4b | Do they describe how the transfer process is done? | Yes/No |
| 5 | Reimbursement systems indicated? | Yes/No |
| 6 | Which audience is the website directed towards? | Multi-select from: |
| General Public |
| General Health Care Providers |
| End User Surgeons/Researchers |
| Other eye and tissue sector providers |
| Investors |
| None of the above |
| 7 | Does the website promote products containing human materials? | Yes/No |
| 8 | Promote products of another manufacturer? | Yes/No |
| 9 | Promote own proprietary items? | Yes/No |
| 10 | Asks the public to donate their eyes on their death? | Yes/No |
| 11 | Directs public to a registered donation register? | Yes/No |
| 11b | Collects details? | Yes/No |
| 12 | Asks the public for direct donation of funds? | Yes/No |
| 13 | Provides investor information? | Yes/No |
| 14 | Asks philanthropists for direct donation of funds? | Yes/No |
| 15 | Stated that they do export? | Yes/No |
| 16 | Export Accredited for their stated purpose, Registered or Licensed facility? | Yes/No |
| 17 | Outlines their export allocation decision-making process? | Yes/No |
| 18 | Engages distributors/brokers or mention of allocation affiliation? | Yes/No |
| 19 | States that permission to export is part of their consent process? | Yes/No |
